# Supplementary material
Source: bioRxiv or medRxiv preprint supplement (https://medrxiv.org/highwire/filestream/88659/field_highwire_adjunct_files/0/2020.07.07.20147934-1.pdf)

# CXR in COVID Analysis

true

10/06/2020

## Contents

|                                                                                               |    |
|-----------------------------------------------------------------------------------------------|----|
| Software Environment and Packages . . . . .                                                   | 2  |
| Load Packages and Data . . . . .                                                              | 4  |
| Load Packages: . . . . .                                                                      | 4  |
| Power Calculation . . . . .                                                                   | 4  |
| Load Data: . . . . .                                                                          | 4  |
| Data Cleaning . . . . .                                                                       | 5  |
| Follow Up Swabs + Initial Swabs Positive: . . . . .                                           | 6  |
| Paired XR and RT-PCR data . . . . .                                                           | 7  |
| Demographic table of raw data . . . . .                                                       | 8  |
| Imputation . . . . .                                                                          | 9  |
| Propensity Score Matching . . . . .                                                           | 12 |
| Match Balance Diagnostics . . . . .                                                           | 12 |
| Diagnostic Accuracy . . . . .                                                                 | 13 |
| CT Data and Accuracy . . . . .                                                                | 14 |
| CT and XR accuracy comparison . . . . .                                                       | 16 |
| Sensitivity . . . . .                                                                         | 16 |
| Intermodality Agreement . . . . .                                                             | 19 |
| Diagnostic Accuracy Analysis when Indeterminate Reports of CXR and CT are taken as positive   | 20 |
| Pooled Regression after Multiple Imputation and Propensity Score Matching . . . . .           | 22 |
| Pooled Univariate Odds Ratios for OverallPos as dependent variable . . . . .                  | 23 |
| Binomial Logistic Regression with Positive Chest X-ray Report as Dependent Variable . . . . . | 23 |
| Univariate XRPositive as dependent . . . . .                                                  | 24 |
| Multivariate XRPositive as dependent . . . . .                                                | 24 |
| Pooled Ordinal Logistic Regression with XRPositive as dependent . . . . .                     | 24 |
| Forest Plots . . . . .                                                                        | 25 |
| Correlation Matrix . . . . .                                                                  | 28 |

## Software Environment and Packages

```
R version 4.0.0 (2020-04-24)
Platform: x86_64-w64-mingw32/x64 (64-bit)
Running under: Windows 10 x64 (build 19041)
Matrix products: default
locale:
LC_COLLATE=English_United Kingdom.1252 LC_CTYPE=English_United Kingdom.1252
LC_MONETARY=English_United Kingdom.1252 LC_NUMERIC=C
LC_TIME=English_United Kingdom.1252
attached base packages:
stats    graphics  grDevices  utils      datasets  methods    base
other attached packages:
corrplot 0.84
  Taiyun Wei and Viliam Simko (2017). R package "corrplot": Visualization of
  a Correlation Matrix (Version 0.84). Available from
  https://github.com/taiyun/corrplot
MKmisc 1.6
  Kohl M (2019). MKmisc: Miscellaneous functions from M. Kohl_. R package version 1.6, http://www.stama
epiR 1.0-14
  Mark Stevenson with contributions from Telmo Nunes, Cord Heuer, Jonathon
  Marshall, Javier Sanchez, Ron Thornton, Jeno Reiczigel, Jim Robison-Cox,
  Paola Sebastiani, Peter Solymos, Kazuki Yoshida, Geoff Jones, Sarah
  Pirikahu, Simon Firestone, Ryan Kyle, Johann Popp, Mathew Jay and Charles
  Reynard. (2020). epiR: Tools for the Analysis of Epidemiological Data. R
  package version 1.0-14. https://CRAN.R-project.org/package=epiR
Matching 4.9-7
  Jasjeet S. Sekhon (2011). Multivariate and Propensity Score Matching
  Software with Automated Balance Optimization: The Matching Package for R.
  Journal of Statistical Software, 42(7), 1-52. URL http://www.jstatsoft.org/v42/i07/.
MASS 7.3-51.5
  Venables, W. N. & Ripley, B. D. (2002) Modern Applied Statistics with S.
  Fourth Edition. Springer, New York. ISBN 0-387-95457-0
Ordinal 2019.12-10
  Christensen, R. H. B. (2019). ordinal - Regression Models for Ordinal Data. R package version 2019
Hmisc 4.4-0
  Frank E Harrell Jr, with contributions from Charles Dupont and many
  others. (2020). Hmisc: Harrell Miscellaneous. R package version 4.4-0.
  https://CRAN.R-project.org/package=Hmisc
Formula 1.2-3
  Achim Zeileis, Yves Croissant (2010). Extended Model Formulas in R:
  Multiple Parts and Multiple Responses. Journal of Statistical Software
  34(1), 1-13. doi:10.18637/jss.v034.i01
lattice 0.20-41
  Sarkar, Deepayan (2008) Lattice: Multivariate Data Visualization with R.
  Springer, New York. ISBN 978-0-387-75968-5
mice 3.8.0
  Stef van Buuren, Karin Groothuis-Oudshoorn (2011). mice: Multivariate
  Imputation by Chained Equations in R. Journal of Statistical Software,
  45(3), 1-67. URL https://www.jstatsoft.org/v45/i03/.
readxl 1.3.1
  Hadley Wickham and Jennifer Bryan (2019). readxl: Read Excel Files. R
  package version 1.3.1. https://CRAN.R-project.org/package=readxl
```

finalfit 1.0.1

Ewen Harrison, Tom Drake and Riinu Ots (2020). finalfit: Quickly Create Elegant Regression Results Tables and Plots when Modelling. R package version 1.0.1. <https://CRAN.R-project.org/package=finalfit>

MatchIt 3.0.2

Daniel E. Ho, Kosuke Imai, Gary King, Elizabeth A. Stuart (2011). MatchIt: Nonparametric Preprocessing for Parametric Causal Inference. Journal of Statistical Software, Vol. 42, No. 8, pp. 1-28. URL <http://www.jstatsoft.org/v42/i08/>

tableone 0.11.1

Kazuki Yoshida (2020). tableone: Create 'Table 1' to Describe Baseline Characteristics. R package version 0.11.1. <https://CRAN.R-project.org/package=tableone>

forcats 0.5.0

Hadley Wickham (2020). forcats: Tools for Working with Categorical Variables (Factors). R package version 0.5.0. <https://CRAN.R-project.org/package=forcats>

stringr 1.4.0

Hadley Wickham (2019). stringr: Simple, Consistent Wrappers for Common String Operations. R package version 1.4.0. <https://CRAN.R-project.org/package=stringr>

dplyr 0.8.5

Hadley Wickham, Romain François, Lionel Henry and Kirill Müller (2020). dplyr: A Grammar of Data Manipulation. R package version 0.8.5. <https://CRAN.R-project.org/package=dplyr>

purrr 0.3.4

Lionel Henry and Hadley Wickham (2020). purrr: Functional Programming Tools. R package version 0.3.4. <https://CRAN.R-project.org/package=purrr>

readr 1.3.1

Hadley Wickham, Jim Hester and Romain Francois (2018). readr: Read Rectangular Text Data. R package version 1.3.1. <https://CRAN.R-project.org/package=readr>

tidyr 1.0.2

Hadley Wickham and Lionel Henry (2020). tidyr: Tidy Messy Data. R package version 1.0.2. <https://CRAN.R-project.org/package=tidyr>

tibble 3.0.0

Hadley Wickham and Lionel Henry (2020). tidyr: Tidy Messy Data. R package version 1.0.2. <https://CRAN.R-project.org/package=tidyr>

ggplot2 3.3.0

H. Wickham. ggplot2: Elegant Graphics for Data Analysis. Springer-Verlag New York, 2016.

tidyverse 1.3.0

Wickham et al., (2019). Welcome to the tidyverse. Journal of Open Source Software, 4(43), 1686, <https://doi.org/10.21105/joss.01686>

forestplot 1.9

Max Gordon and Thomas Lumley (2019). forestplot: Advanced Forest Plot Using 'grid' Graphics. R package

MatchThem 0.9.3

Farhad Pishgar and Noah Greifer (2020). MatchThem: Matching and Weighting Multiply Imputed Datasets. I

miceadds 3.9-14

Robitzsch, A., & Grund, S. (2020). miceadds: Some Additional Multiple Imputation Functions, Especially cobalt 4.2.2

cobalt 4.2.2

Noah Greifer (2020). cobalt: Covariate Balance Tables and Plots. R package version 4.2.2. <https://CRAN.R-project.org/package=cobalt>

## Load Packages and Data

### Load Packages:

```
library(MKmisc)
library(tidyverse)
library(tableone)
library(MatchIt)
library(finalfit)
library(readxl)
library(cobalt)
library(mice)
library(miceadds)
library(Hmisc)
library(epiR)
library(MatchThem)
library(ordinal)
library(forestplot)
```

### Power Calculation

This code calculates the sample size (positive and negative by gold standard test) needed to evaluate a diagnostic test with 50% sensitivity at 80% power with alpha 0.05. The 56% value is the lower confidence reported by Wong et al. and lower sensitivities typically require higher sample sizes, the result is the same whether specificity or sensitivities are passed as arguments, the previously published specificities are higher than sensitivities so for a generous estimate, the sensitivity was used.

```
power.diagnostic.test(sens = 0.56,
                      sig.level = 0.05,
                      delta = 0.1,
                      power = 0.8) %>% print()->power
```

Diagnostic test exact power calculation

```
      sens = 0.56
        n = 165
       n1 = 165
     delta = 0.1
sig.level = 0.05
   power = 0.8
     prev = NULL
```

NOTE: n is number of cases, n1 is number of controls

### Load Data:

```
data <- read_csv(
  "FullDataWithCT.csv",
```

```

col_types = cols(
  Age = col_integer(),
  Albumin = col_number(),
  CK = col_number(),
  CT = col_character(),
  CRP = col_number(),
  DDimer = col_number(),
  DateOfDeath = col_date(format = "%d/%m/%Y"),
  DateOfDischarge = col_date(format = "%d/%m/%Y"),
  DateOfVisit = col_date(format = "%d/%m/%Y"),
  DateOfSymptomOnset = col_date(format = "%d/%m/%Y"),
  DiastolicBP = col_number(),
  FiO2 = col_skip(),
  GCS = col_number(),
  HR = col_number(),
  MRN = col_skip(),
  NEWS = col_number(),
  'NEWS2(noFiO2)' = col_skip(),
  Neutrophils = col_number(),
  RR = col_number(),
  Sats = col_number(),
  'Supplemental Oxygen' = col_skip(),
  SystolicBP = col_number(),
  Temperature = col_number(),
  Troponin = col_number(),
  CTBSTI = col_integer()
)
)

```

---

## Data Cleaning

Format data into factors/ differences between dates:

```

data <- mutate_if(data, is.character, as.factor)
data$DayOfSymptoms <-
  difftime(data$DateOfVisit, data$DateOfSymptomOnset, units = "days")
data$TimeToDeath <-
  abs(difftime(data$DateOfDeath, data$DateOfVisit, units = "days"))
data$DayOfSymptoms <- as.numeric(data$DayOfSymptoms)
data$TimeToDeath <- as.numeric(data$TimeToDeath)

```

**Recode ethnicities as too many options:** This code collapses the ethnicity categories into 'White', 'Black', 'South Asian', 'Other Asian', 'Mixed' or 'Other';

```

fct_collapse(
  data$Ethnicity,
  White = c(
    "White - British",
    "White - Irish",

```

```

    "White - Any Other White Background"
  )
) -> data$Ethnicity
fct_collapse(
  data$Ethnicity,
  Black = c(
    "Black - Any Other Black Background",
    "Black or Black British - AOrican",
    "Black or Black British - African",
    "Black or Black British - Caribbean"
  )
) -> data$Ethnicity
fct_collapse(
  data$Ethnicity,
  'South Asian' = c(
    "Asian or Asian British - Bangladeshi",
    "Asian or Asian British - Indian",
    "Asian or Asian British - Pakistani"
  )
) -> data$Ethnicity
fct_collapse(data$Ethnicity,
  'Other Asian' = c("Asian - Any Other Asian Background",
    "Other - Chinese")) -> data$Ethnicity
fct_collapse(
  data$Ethnicity,
  'Mixed' = c(
    "mixed - Any Other mixed Background",
    "Mixed - Any Other Mixed Background",
    "Mixed - White and Asian",
    "Mixed - White and Black African",
    "mixed - White and Black Caribbean",
    "Mixed - White and Black Caribbean"
  )
) -> data$Ethnicity

```

New XR positive column for "Classic Covid" or not:

```

data$XRPositive <-
  ifelse(data$XR Chest == "Classic COVID", "Positive", "Negative")
data$XRPositive <- as.factor(data$XRPositive)

```

### Follow Up Swabs + Initial Swabs Positive:

Creates new column 'OverallPos' which includes initial RT-PCR swab and follow-up swabs in 30 days of attendance, if any are positive the value will be positive in this column

```

data$OverallPos <- case_when(data$RTPCR == "Positive" | data$FollowUpPos == "Positive" ~ "Positive")
replace_na(data$OverallPos, "Negative") -> data$OverallPos

```

Create new vector with all variable names (i.e. the column headers)

```
explanatory <- names(data)
```

## Paired XR and RT-PCR data

```
completedata <- filter(data, !is.na(data$XRPositive) & !is.na(data$RTPCR))
```

**Creates new variable 'completedata' which contains only patients who had both CXR and RT-PCR in ED**

```
completedata <- completedata[-c(31)]
```

## Remove missing data variable

```
completedata$OverallPos <- as.factor(completedata$OverallPos)

completedata$ThirtyDayFU<-as.factor(completedata$ThirtyDayFU)
completedata$TimeToDeath <-
  abs(difftime(completedata$DateOfDeath,
              completedata$DateOfVisit, units = "days"))

completedata$TimeToDeath <- as.numeric(completedata$TimeToDeath)
```

**Format complete data variables** Set 'XRchest' as ordinal variable on scale of 'Alternative pathology' as lowest value and 'Classical COVID' as highest

```
completedata$XRchest <- ordered(
  completedata$XRchest,
  levels = c(
    "Alternative pathology",
    "No abnormalities",
    "Indeterminate",
    "Classic COVID"
  )
)
```

Convert CT BSTI grade column into factor:

```
completedata$CTBSTI<-as.factor(completedata$CTBSTI)
```

## Demographic table of raw data

This code creates an unformatted demographic table (table 2 in manuscript), for the raw data, stratified by RT-PCR status, significance testing between RT-PCR +ve and -ve groups is carried out automatically using chi squared, t-tests, ANOVA etc.; there is also a column for the proportion of missing data

```
CreateTableOne(vars = explanatory,
               strata = 'OverallPos',
               data = completedata) -> demogtable
```

```
#### List nonnormal factors for summarisation as median / IQR and non parametric statistical test
```

```
explanatorynonnormal<-c("Sats","RR", "GCS", "SystolicBP", "Temperature", "HR", "Neutrophils",
+ "DDimer","Albumin","CRP","CK","Troponin")
```

```
as.data.frame(print(demogtable, nonnormal = explanatorynonnormal, missing = TRUE))->demogtable
```

```
write.csv(demogtable, file = "Demogtable.csv")
```

|                                |                           |                           |                |
|--------------------------------|---------------------------|---------------------------|----------------|
| Age (mean (SD))                | 62.74 (17.72)             | 66.18 (17.58)             | 0.001          |
| Ethnicity (%)                  |                           |                           | 0.097          |
| Other Asian                    | 29 ( 8.0)                 | 72 ( 11.8)                |                |
| South Asian                    | 27 ( 7.5)                 | 38 ( 6.2)                 |                |
| Black                          | 41 (11.4)                 | 91 ( 14.9)                |                |
| Mixed                          | 6 ( 1.7)                  | 6 ( 1.0)                  |                |
| Other - Any Other Ethnic Group | 56 (15.5)                 | 105 ( 17.2)               |                |
| White                          | 202 (56.0)                | 297 ( 48.8)               |                |
| Sex = Male (%)                 | 233 (53.6)                | 480 ( 62.9)               | 0.002          |
| Sats (median [IQR])            | 95.00 [92.00, 98.00]      | 93.00 [88.00, 96.00]      | <0.001 nonnorm |
| RR (median [IQR])              | 22.00 [20.00, 28.00]      | 26.00 [20.00, 32.00]      | <0.001 nonnorm |
| GCS (median [IQR])             | 15.00 [15.00, 15.00]      | 15.00 [15.00, 15.00]      | 0.043 nonnorm  |
| SystolicBP (median [IQR])      | 134.00 [119.00, 151.50]   | 130.00 [115.00, 145.00]   | 0.009 nonnorm  |
| DiastolicBP (mean (SD))        | 79.54 (16.40)             | 75.61 (14.51)             | <0.001         |
| HR (median [IQR])              | 96.00 [83.00, 110.00]     | 94.00 [81.00, 108.00]     | 0.092 nonnorm  |
| Temperature (median [IQR])     | 37.10 [36.60, 38.00]      | 37.70 [37.00, 38.40]      | <0.001 nonnorm |
| XR Chest (%)                   |                           |                           | <0.001         |
| Alternative pathology          | 4 ( 0.9)                  | 3 ( 0.4)                  |                |
| No abnormalities               | 178 (40.9)                | 136 ( 17.8)               |                |
| Indeterminate                  | 83 (19.1)                 | 169 ( 22.1)               |                |
| Classic COVID                  | 170 (39.1)                | 455 ( 59.6)               |                |
| CTPA = PE (%)                  | 16 (30.2)                 | 28 ( 45.9)                | 0.127          |
| Comorbidity = Yes (%)          | 297 (79.0)                | 482 ( 80.3)               | 0.669          |
| Dyspnoea = Yes (%)             | 274 (69.4)                | 497 ( 75.5)               | 0.034          |
| Neutrophils (median [IQR])     | 6.42 [4.55, 9.11]         | 5.25 [3.69, 7.61]         | <0.001 nonnorm |
| DDimer (median [IQR])          | 1250.00 [619.00, 3059.00] | 1105.00 [626.00, 2428.50] | 0.204 nonnorm  |
| Albumin (median [IQR])         | 39.00 [35.00, 42.00]      | 37.00 [34.00, 40.00]      | <0.001 nonnorm |
| CRP (median [IQR])             | 51.00 [13.00, 117.00]     | 83.00 [42.00, 158.00]     | <0.001 nonnorm |
| CK (median [IQR])              | 91.00 [54.00, 169.00]     | 146.50 [78.00, 342.75]    | <0.001 nonnorm |
| Troponin (median [IQR])        | 19.00 [7.00, 53.00]       | 20.00 [9.00, 53.00]       | 0.278 nonnorm  |
| Admitted = Discharged (%)      | 104 (24.0)                | 128 ( 16.8)               | 0.003          |
| AdmittedToITU = Yes (%)        | 5 ( 1.3)                  | 32 ( 4.8)                 | 0.005          |
| RTPCR = Positive (%)           | 0 ( 0.0)                  | 738 ( 96.7)               | <0.001         |
| CT = 1 (%)                     | 37 (57.8)                 | 26 ( 86.7)                | 0.011          |
| NEWS (mean (SD))               | 4.36 (3.06)               | 5.48 (2.71)               | 0.032          |
| ThirtyDayFU (%)                |                           |                           | <0.001         |



|                           |               |               |        |
|---------------------------|---------------|---------------|--------|
| 1                         | 219 (78.2)    | 367 ( 58.3)   |        |
| 2                         | 14 ( 5.0)     | 49 ( 7.8)     |        |
| 3                         | 18 ( 6.4)     | 60 ( 9.5)     |        |
| 4                         | 29 (10.4)     | 154 ( 24.4)   |        |
| CTBSTI (%)                |               |               | <0.001 |
| 0                         | 23 (22.1)     | 6 ( 3.3)      |        |
| 1                         | 52 (50.0)     | 157 ( 85.8)   |        |
| 2                         | 14 (13.5)     | 14 ( 7.7)     |        |
| 3                         | 15 (14.4)     | 6 ( 3.3)      |        |
| DayOfSymptoms (mean (SD)) | 9.84 (9.63)   | 8.56 (15.80)  | 0.368  |
| TimeToDeath (mean (SD))   | 50.33 (77.93) | 57.76 (70.02) | 0.618  |
| XRPositive = Positive (%) | 170 (39.1)    | 455 ( 59.6)   | <0.001 |
| OverallPos = Positive (%) | 0 ( 0.0)      | 763 (100.0)   |        |

---

Limited dataset comprising relevant data and those without significant missingness:

```
limcompletedata <- dplyr::select(completedata,
  c("Age",
    "XR Chest",
    "Ethnicity",
    "Sex",
    "RR",
    "Sats",
    "GCS",
    "Temperature",
    "HR",
    "SystolicBP",
    "DiastolicBP",
    "Neutrophils",
    "DDimer",
    "CRP",
    "Troponin",
    "Albumin",
    "CK",
    "OverallPos",
    "Admitted",
    "AdmittedToITU",
    "ThirtyDayFU",
    "Dyspnoea",
    "Comorbidity",
    "XRPositive"))
```

---

## Imputation

This code generates 15 imputed datasets using the permuted mean matching method, based on the 'lim-completedata' dataset which has filtered the most relevant fields, with minimal missing data initially

```
imputed <- mice(limcompletedata, m = 15, method = 'pmm')
```

Imputation Diagnostics Density plot, this corresponds to supplementary figure 1:

```
densityplot(imputed)
```

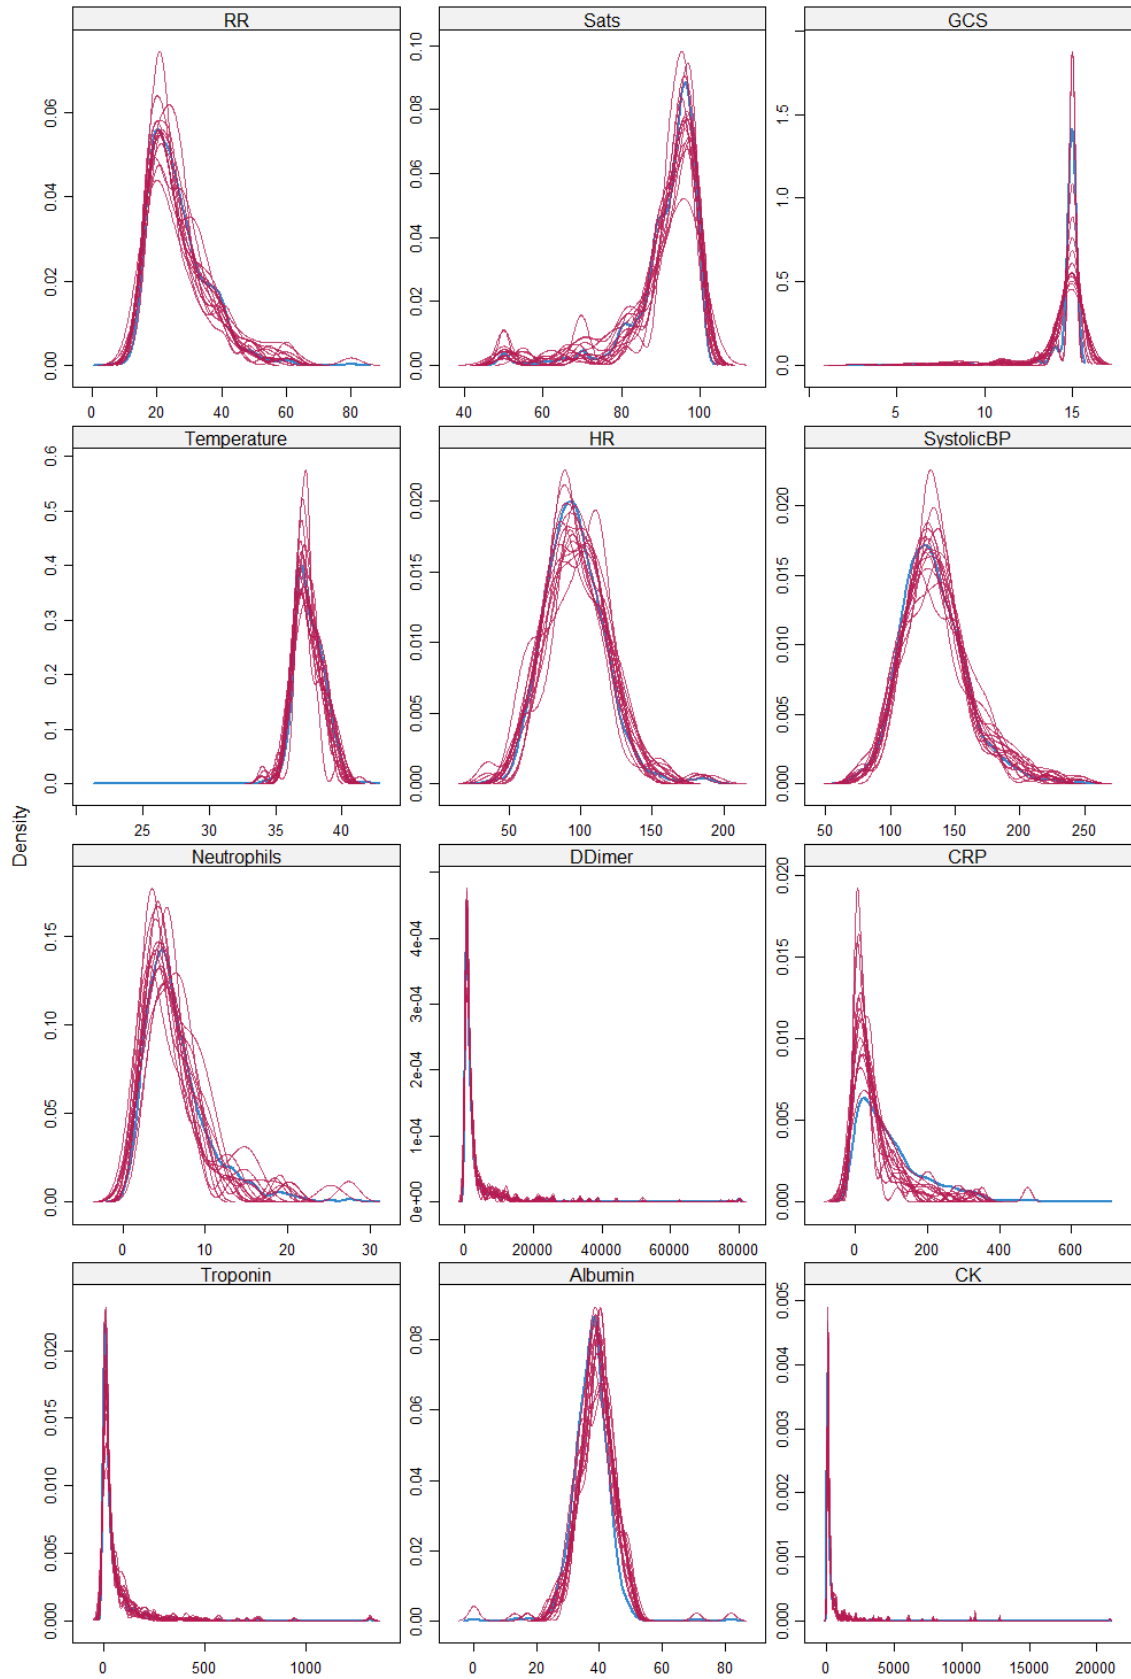

---

## Propensity Score Matching

This code matches data in the imputed datasets on whether the XR was reported classical COVID or not, the matching is done based on the covariates Sex, Age, Comorbidity, Ethnicity and Respiratory Rate

```
library(MatchThem)
#### MatchThem package requires dependent variable to be coded as 0 or 1
imputed[["data"]][["XRPositive"]] %>% recode_factor("Positive" = "1", "Negative" = "0") -> imputed[["data"]]
matchthem(
  XRPositive ~ Sex + Age + Comorbidity + Ethnicity + RR,
  data = imputed,
  method = 'nearest',
  verbose = FALSE,
  replace = FALSE,
  ratio = 1,
  caliper = 0.2,
  m.order = "random",) -> matchedtest
### Set XRChest to unordered for binomial analyses
matchedtest[["datasets"]]c(1:15)[["XRChest"]] %>% factor(ordered = FALSE) -> matched2[["datasets"]]c(1:15)
```

---

## Match Balance Diagnostics

```
#### Supplementary tables 1,2 and 3:
bal.tab(matchedtest)
#### Supplementary figure 2
bal.plot(matchedtest)
#### Supplementary figure 3:
bal.plot(matchedtest, var.name = "Age", type = "histogram", which = "both")
bal.plot(matchedtest, var.name = "Sex", type = "histogram", which = "both")
bal.plot(matchedtest, var.name = "Ethnicity", type = "histogram", which = "both")
bal.plot(matchedtest, var.name = "RR", type = "histogram", which = "both")
bal.plot(matchedtest, var.name = "Comorbidity", type = "histogram", which = "both")
#### Supplementary figure 4:
love.plot(matchedtest)
```

**Creates plots and table with mean difference and distribution of values in covariates between XR +ve and -ve groups after matching across all imputed datasets:**

**Matched Demographics Table:** Stack matched imputed datasets into one large dataset and split into COVID +ve and -ve groups:

```
### 'all=FALSE' gets matched data only
stacked<-MatchThem::complete(matchedtest, n = c(1:15), all = FALSE)
stacked<-stacked %>% filter(.imp>0)
```

Creates demographics table as above, but on propensity matched imputed datasets, corresponds to Table 4:

```
CreateTableOne(strata = "OverallPos", data = stacked)-> table4
#### Means and SD kept as is, mean counts calculated after dividing by 15 (as 15 imputed datasets)
```

Creates demographic table stratified by XR Positive or Negative on matched imputed datasets, corresponds to Table 5:

```
CreateTableOne(strata = "XRPositive", data = stacked)-> table5
#### Means and SD kept as is, mean counts calculated after dividing by 15 (as 15 imputed datasets)
```

Summary statistics for pooled data:

```
### Normal means sd
explanatorynorm<-c("Age","Temperature","HR","SystolicBP")
stacked %>% group_by(OverallPos) %>%
  summarise_at(vars(explanatorynorm),list(mean.default, sd))->summarynormalOverallPos
stacked %>% group_by(XRPositive) %>%
  summarise_at(vars(explanatorynorm),list(mean.default, sd))->summarynormalXRPositive

### Non normal medians and IQR
stacked %>% group_by(OverallPos) %>%
  summarise_at(vars(explanatorynnormal),list(median, IQR))->summarynnormalOverallPos
stacked %>% group_by(XRPositive) %>%
  summarise_at(vars(explanatorynnormal),list(median, IQR))->summarynnormalXRPositive
```

---

## Diagnostic Accuracy

This section generates the diagnostic accuracy statistics (e.g. sensitivity, specificity) for CXR and CT with RT-PCR as the reference standard using the matched imputed datasets

```
contingxr <-
  matrix(c(305,243,125,187),
        nrow = 2,
        ncol = 2)

colnames(contingxr) <- c("PCR+", "PCR-")
rownames(contingxr) <- c("XR+", "XR-")
```

This code creates a contingency table of False/ True Positives and Negatives for Chest X-ray taken from the demographic tables above:

```
epi.tests(contingxr, conf.level = 0.95) -> xraccuracy
```

**This function calculates diagnostic accuracy test statistics:**

```
xraccuracy
      Outcome +   Outcome -   Total
Test +         305         125     430
Test -         243         187     430
Total          548         312     860

Point estimates and 95 % CIs:
-----
Apparent prevalence           0.50 (0.47, 0.53)
True prevalence               0.64 (0.60, 0.67)
Sensitivity                   0.56 (0.51, 0.60)
Specificity                   0.60 (0.54, 0.65)
Positive predictive value     0.71 (0.66, 0.75)
Negative predictive value     0.43 (0.39, 0.48)
Positive likelihood ratio     1.39 (1.19, 1.62)
Negative likelihood ratio     0.74 (0.65, 0.84)
-----
```

**Giving the diagnostic accuracy output for CXR in table 3:** NB diagnostic accuracy values in table available in list view of xraccuracy variable

---

## CT Data and Accuracy

Only those with CT and RT PCR:

```
CTdata <-
  filter(data, is.na(data$CTBSTI) == FALSE &
           is.na(data$RTPCR) == FALSE)
```

Select relevant variables

```
CTdata <-
  dplyr::select(CTdata, c("Age",
                          "XRChest",
                          "Ethnicity",
                          "Sex",
                          "RR",
                          "Sats",
                          "GCS",
                          "Temperature",
```

```

"HR",
"SystolicBP",
"DiastolicBP",
"Neutrophils",
"DDimer",
"CRP",
"Troponin",
"OverallPos",
"Admitted",
"AdmittedToITU",
"ThirtyDayFU",
"Dyspnoea",
"Comorbidity",
"XRPositive",
"OverallPos",
"CTBSTI"))

```

Set RT-PCR as factor:

```
CTdata$OverallPos<-as.factor(CTdata$OverallPos)
```

Rename 1 and 0 to Positive and Negative:

```

CTdata$CTPositive <-
  ifelse(CTdata$CTBSTI == "1", "Positive", "Negative")
CTdata$CTPositive <- as.factor(CTdata$CTPositive)

```

Regression with CT as outcome variable:

```

CT <- finalfit(
  CTdata,
  "OverallPos",
  c(
    "Age",
    "Sex",
    "RR",
    "GCS",
    "CTPositive",
    "Temperature",
    "HR",
    "SystolicBP",
    "DiastolicBP",
    "Sats",
    "Dyspnoea",
    "Comorbidity"
  ),
  confint_level = 0.95
)

```

Contingency table of True/False Positives and Negatives for CT taken from Regression table:

```

contingct <-
  matrix(c(CT[7,4], CT[6,4], CT[7,3], CT[6,3]),
        nrow = 2,
        ncol = 2)
colnames(contingct) <- c("PCR+", "PCR-")
rownames(contingct) <- c("CT+", "CT-")
substr(contingct, start = 1, stop = 3)->contingct
sapply(contingct, as.numeric)->contingct
matrix(contingct, nrow = 2, ncol = 2)->contingct
colnames(contingct) <- c("PCR+", "PCR-")

rownames(contingct) <- c("CT+", "CT-")

```

Diagnostic accuracy statistics for CT

```

epi.tests(contingct, conf.level = 0.95) -> ctaccuracy

```

|        | Outcome + | Outcome - | Total |
|--------|-----------|-----------|-------|
| Test + | 162       | 55        | 217   |
| Test - | 29        | 56        | 85    |
| Total  | 191       | 111       | 302   |

Point estimates and 95 % CIs:

```

-----
Apparent prevalence           0.72 (0.66, 0.77)
True prevalence               0.63 (0.58, 0.69)
Sensitivity                   0.85 (0.79, 0.90)
Specificity                   0.50 (0.41, 0.60)
Positive predictive value     0.75 (0.68, 0.80)
Negative predictive value     0.66 (0.55, 0.76)
Positive likelihood ratio     1.71 (1.41, 2.08)
Negative likelihood ratio     0.30 (0.21, 0.44)
-----

```

NB Diagnostic accuracy values found in list view rather than output

## CT and XR accuracy comparison

In this section mean differences of diagnostic accuracy statistics between CT and Chest X-ray with confidence intervals and p-values are calculated

### Sensitivity

Upper confidence limit for difference in sensitivity

```

ubsens<-(ctaccuracy[["elements"]][["se.up"]]-xraccuracy[["elements"]][["se.low"]])

```

Lower confidence limit for difference in sensitivity



```
lbsens<-(ctaccuracy[["elements"]][["se.low"]]-xraccuracy[["elements"]][["se.up"]])
```

Mean difference in sensitivity

```
meansens<-ctaccuracy[["elements"]][["se"]]-xraccuracy[["elements"]][["se"]]
```

Standard error for sensitivity

```
sesens<-(ubsens-lbsens)/(2*1.96)
```

value for difference in sensitivity

```
meansens/sesens->zsens
```

P-value for difference in sensitivity

```
psens <- exp(-0.717*zsens - 0.416*zsens^2)
```

Format values into 'mean difference (95% CI) p-value' rounded to 2 d.p.

```
sprintf("%s (%s-%s)",
        round(meansens, digits = 2), round(lbsens, digits = 2),
        round(ubsens, digits = 2))->diffsens
diffsensp<-c(diffsens,psens)
```

Subsequent analyses in this section follow the code above

```
##Specificity
ubspec<-(ctaccuracy[["elements"]][["sp.up"]]-xraccuracy[["elements"]][["sp.low"]])
lbspec<-(ctaccuracy[["elements"]][["sp.low"]]-xraccuracy[["elements"]][["sp.up"]])
meanspec<-ctaccuracy[["elements"]][["sp"]]-xraccuracy[["elements"]][["sp"]]
sespec<-(ubspec-lbspec)/(2*1.96)
meanspec/sespec->zspec
pspec <- exp(-0.717*zspec - 0.416*zspec^2)
sprintf("%s (%s-%s)",
        round(meanspec, digits = 2), round(lbspec, digits = 2),
        round(ubspec, digits = 2))->diffspec
diffspecp<-c(diffspec,pspec)
```

```
ubda<-(ctaccuracy[["elements"]][["da.up"]]-xraccuracy[["elements"]][["da.low"]])
lbda<-(ctaccuracy[["elements"]][["da.low"]]-xraccuracy[["elements"]][["da.up"]])
meanda<-ctaccuracy[["elements"]][["da"]]-xraccuracy[["elements"]][["da"]]
seda<-(ubda-lbda)/(2*1.96)
meanda/seda->zda
pda <- exp(-0.717*zda - 0.416*zda^2)
sprintf("%s (%s-%s)",
        round(meanda, digits = 2), round(lbda, digits = 2),
        round(ubda, digits = 2))->diffda
diffdap<-c(diffda,pda)
```

```
##Positive Likelihood Ratio
```

```

ublrpos<- (ctaccuracy[["elements"]][["lrpos.up"]]-xraccuracy[["elements"]][["lrpos.low"]])
lblrpos<- (ctaccuracy[["elements"]][["lrpos.low"]]-xraccuracy[["elements"]][["lrpos.up"]])
meanlrpos<-ctaccuracy[["elements"]][["lrpos"]]-xraccuracy[["elements"]][["lrpos"]]
selrpos<-(ublrpos-lblrpos)/(2*1.96)
meanlrpos/selrpos->zlrpos
plrpos <- exp(-0.717*zlrpos - 0.416*zlrpos^2)
sprintf("%s (%s-%s)",
        round(meanlrpos, digits = 2), round(lblrpos, digits = 2),
        round(ublrpos, digits = 2))->difflrpos
difflrposp<-c(difflrpos,plrpos)
##Negative Likelihood Ratios
ublrneg<- (ctaccuracy[["elements"]][["lrneg.up"]]-xraccuracy[["elements"]][["lrneg.low"]])
lblrneg<- (ctaccuracy[["elements"]][["lrneg.low"]]-xraccuracy[["elements"]][["lrneg.up"]])
meanlrneg<-ctaccuracy[["elements"]][["lrneg"]]-xraccuracy[["elements"]][["lrneg"]]
selrneg<-(ublrneg-lblrneg)/(2*1.96)
meanlrneg/selrneg->zlrneg
plrneg <- exp(-0.717*zlrneg - 0.416*zlrneg^2)
sprintf("%s (%s-%s)",
        round(meanlrneg, digits = 2), round(lblrneg, digits = 2),
        round(ublrneg, digits = 2))->difflrneg
difflrnegp<-c(difflrneg,plrneg)

##Positive Predictive Value
ppv<- (ctaccuracy[["elements"]][["ppv.low"]]-xraccuracy[["elements"]][["ppv.up"]])
meanppv<-ctaccuracy[["elements"]][["ppv"]]-xraccuracy[["elements"]][["ppv"]]
seppv<-(ubppv-lbppv)/(2*1.96)
meanppv/seppv->zppv
pppv <- exp(-0.717*zppv - 0.416*zppv^2)
sprintf("%s (%s-%s)",
        round(meanppv, digits = 2), round(lbppv, digits = 2),
        round(ubppv, digits = 2))->diffppv
diffppvp<-c(diffppv,pppv)

##Negative Predictive Value
npv<- (ctaccuracy[["elements"]][["npv.low"]]-xraccuracy[["elements"]][["npv.up"]])
meannpv<-ctaccuracy[["elements"]][["npv"]]-xraccuracy[["elements"]][["npv"]]
senpv<-(ubnpv-lbnpv)/(2*1.96)
meannpv/senpv->znpv
pnpv <- exp(-0.717*znpv - 0.416*znpv^2)
sprintf("%s (%s-%s)",
        round(meannpv, digits = 2), round(lbnpv, digits = 2),
        round(ubnpv, digits = 2))->diffnpv
diffnpvp<-c(diffnpv,pnpv)

##Apparent Prevalence
meantp<-ctaccuracy[["elements"]][["tp"]]-xraccuracy[["elements"]][["tp"]]
setp<-(ubtp-lbtp)/(2*1.96)
meantp/setp->ztp
ptp <- exp(-0.717*ztp - 0.416*ztp^2)
sprintf("%s (%s-%s)",
        round(meantp, digits = 2), round(lbtp, digits = 2),

```

```

    round(ubtp, digits = 2))->difftp
diffpp<-c(difftp,ptp)

##True Prevalence
meanap<-ctaccuracy[["elements"]][["ap"]]-xraccuracy[["elements"]][["ap"]]
seap<-(ubap-lbap)/(2*1.96)
meanap/seap->zap
pap <- exp(-0.717*zap - 0.416*zap^2)
sprintf("%s (%s-%s)",
        round(meanap, digits = 2), round(lbap, digits = 2),
        round(ubap, digits = 2))->diffap
diffapp<-c(diffap,pap)

```

## Intermodality Agreement

This section contains code to analyse the level of agreement in the unmatched CT dataset which contains only data with CT, XR and RT-PCR

First- comparing CT and XR agreement

```

library(irr)
kappa2(c(CTdata$XRPositive,CTdata$CTPositive), weight = "squared")
d<-CTdata %>% select(c("CTPositive","XRPositive"))
View(d)
kappa2(d, weight = "squared")

```

Output:

```

Cohen's Kappa for 2 Raters (Weights: squared)

Subjects = 287
Raters = 2
Kappa = 0.406

z = 7.14
p-value = 9.37e-13

```

The following code compares RT-PCR, CT and XR

```

d2<-CTdata %>% select(c("CTPositive","XRPositive","OverallPos"))
View(d2)
kappam.fleiss(d2)

```

Output:

```

Fleiss' Kappa for m Raters

Subjects = 287
Raters = 3
Kappa = 0.361

z = 10.6
p-value = 0

```

---

## Diagnostic Accuracy Analysis when Indeterminate Reports of CXR and CT are taken as positive

**XR Indeterminates** New column for positive if indeterminate

```
stacked$XRIndPositive<-ifelse(stacked$XRchest=="Classic COVID" | stacked$XRchest == "Indeterminate",
                             "Positive", "Negative")
stacked$XRIndPositive<-as.factor(stacked$XRIndPositive)
stacked %>% filter(OverallPos == "Positive")->stackedpos
stacked %>% filter(OverallPos == "Negative")->stackedneg
summary(stackedpos$XRIndPositive)
summary(stackedneg$XRIndPositive)

contingxrind<-matrix(c(441,107,186,126),nrow = 2,ncol = 2)
colnames(contingxrind) <- c("PCR+", "PCR-")

rownames(contingxrind) <- c("XR+", "XR-")
epi.tests(contingxrind)->xrindaccuracy
```

In this section mean differences of diagnostic accuracy statistics between CT (when CT indeterminates are not counted as positive)and Chest X-ray with confidence intervals and p-values are calculated, follows the same pattern as code previously

```
##### Sensitivity
##### Upper confidence limit for difference in sensitivity

ubsens<-(ctaccuracy[["elements"]][["se.up"]]-xrindaccuracy[["elements"]][["se.low"]])
##Lower confidence limit for difference in sensitivity
lbsens<-(ctaccuracy[["elements"]][["se.low"]]-xrindaccuracy[["elements"]][["se.up"]])
##Mean difference in sensitivity
meansens<-ctaccuracy[["elements"]][["se"]]-xrindaccuracy[["elements"]][["se"]]
##Standard error for sensitivity
sesens<-(ubsens-lbsens)/(2*1.96)
##Z value for difference in sensitivity
meansens/sesens->zsens
##P-value for difference in sensitivity
psens <- exp(-0.717*zsens - 0.416*zsens^2)
###Format values into 'mean difference (95% CI) p-value' rounded to 2 d.p.
sprintf("%s (%s-%s)",
        round(meansens, digits = 2), round(lbsens, digits = 2),
        round(ubsens, digits = 2))->diffsens
diffsensp<-c(diffsens,psens)

###Subsequent analyses in this section follow the code above
##Specificity
ubspec<-(ctaccuracy[["elements"]][["sp.up"]]-xrindaccuracy[["elements"]][["sp.low"]])
lbspec<-(ctaccuracy[["elements"]][["sp.low"]]-xrindaccuracy[["elements"]][["sp.up"]])
meanspec<-ctaccuracy[["elements"]][["sp"]]-xrindaccuracy[["elements"]][["sp"]]
sespec<-(ubspec-lbspec)/(2*1.96)
meanspec/sespec->zspec
pspec <- exp(-0.717*zspec - 0.416*zspec^2)
```

```

sprintf("%s (%s-%s)",
        round(meanspec, digits = 2), round(lbspec, digits = 2),
        round(ubspec, digits = 2))->diffspec
diffspecp<-c(diffspec,pspec)

ubda<-(ctaccuracy[["elements"]][["da.up"]]-xrindaccuracy[["elements"]][["da.low"]])
lbda<-(ctaccuracy[["elements"]][["da.low"]]-xrindaccuracy[["elements"]][["da.up"]])
meanda<-ctaccuracy[["elements"]][["da"]]-xrindaccuracy[["elements"]][["da"]]
seda<-(ubda-lbda)/(2*1.96)
meanda/seda->zda
pda <- exp(-0.717*zda - 0.416*zda^2)
sprintf("%s (%s-%s)",
        round(meanda, digits = 2), round(lbda, digits = 2),
        round(ubda, digits = 2))->diffda
diffdap<-c(diffda,pda)
##Positive Likelihood Ratio
ublrpos<-(ctaccuracy[["elements"]][["lrpos.up"]]-xrindaccuracy[["elements"]][["lrpos.low"]])
lblrpos<-(ctaccuracy[["elements"]][["lrpos.low"]]-xrindaccuracy[["elements"]][["lrpos.up"]])
meanlrpos<-ctaccuracy[["elements"]][["lrpos"]]-xrindaccuracy[["elements"]][["lrpos"]]
selrpos<-(ublrpos-lblrpos)/(2*1.96)
meanlrpos/selrpos->zlrpos
plrpos <- exp(-0.717*zlrpos - 0.416*zlrpos^2)
sprintf("%s (%s-%s)",
        round(meanlrpos, digits = 2), round(lblrpos, digits = 2),
        round(ublrpos, digits = 2))->difflrpos
difflrposp<-c(difflrpos,plrpos)
##Negative Likelihood Ratios
ublrneg<-(ctaccuracy[["elements"]][["lrneg.up"]]-xrindaccuracy[["elements"]][["lrneg.low"]])
lblrneg<-(ctaccuracy[["elements"]][["lrneg.low"]]-xrindaccuracy[["elements"]][["lrneg.up"]])
meanlrneg<-ctaccuracy[["elements"]][["lrneg"]]-xrindaccuracy[["elements"]][["lrneg"]]
selrneg<-(ublrneg-lblrneg)/(2*1.96)
meanlrneg/selrneg->zlrneg
plrneg <- exp(-0.717*zlrneg - 0.416*zlrneg^2)
sprintf("%s (%s-%s)",
        round(meanlrneg, digits = 2), round(lblrneg, digits = 2),
        round(ublrneg, digits = 2))->difflrneg
difflrnegp<-c(difflrneg,plrneg)

##Positive Predictive Value
ppv<-(ctaccuracy[["elements"]][["ppv.low"]]-xrindaccuracy[["elements"]][["ppv.up"]])
meanppv<-ctaccuracy[["elements"]][["ppv"]]-xrindaccuracy[["elements"]][["ppv"]]
seppv<-(ubppv-lbppv)/(2*1.96)
meanppv/seppv->zppv
pppv <- exp(-0.717*zppv - 0.416*zppv^2)
sprintf("%s (%s-%s)",
        round(meanppv, digits = 2), round(lbppv, digits = 2),
        round(ubppv, digits = 2))->diffppv
diffppvp<-c(diffppv,pppv)

##Negative Predictive Value
npv<-(ctaccuracy[["elements"]][["npv.low"]]-xrindaccuracy[["elements"]][["npv.up"]])

```

```

meanppv<-ctaccuracy[["elements"]][["npv"]]-xrindaccuracy[["elements"]][["npv"]]
senpv<-(ubnpv-lbnpv)/(2*1.96)
meanppv/senpv->znpv
pnpv <- exp(-0.717*znpv - 0.416*znpv^2)
sprintf("%s (%s-%s)",
        round(meanppv, digits = 2), round(lbnpv, digits = 2),
        round(ubnpv, digits = 2))>diffnpv
diffnpvp<-c(diffnpv,pnpv)

##True Prevalence
meantp<-ctaccuracy[["elements"]][["tp"]]-xrindaccuracy[["elements"]][["tp"]]
setp<-(ubtp-lbtp)/(2*1.96)
meantp/setp->ztp
ptp <- exp(-0.717*ztp - 0.416*ztp^2)
sprintf("%s (%s-%s)",
        round(meantp, digits = 2), round(lbtp, digits = 2),
        round(ubtp, digits = 2))>difftp
difftpv<-c(difftp,ptp)

##Apparent Prevalence
meanap<-ctaccuracy[["elements"]][["ap"]]-xrindaccuracy[["elements"]][["ap"]]
seap<-(ubap-lbap)/(2*1.96)
meanap/seap->zap
pap <- exp(-0.717*zap - 0.416*zap^2)
sprintf("%s (%s-%s)",
        round(meanap, digits = 2), round(lbap, digits = 2),
        round(ubap, digits = 2))>diffap
diffapp<-c(diffap,pap)

```

**CT Indeterminates** New column for positive if indeterminate

```

CTdata$CTIndPositive<-ifelse(CTdata$CTBSTI=="1" | CTdata$CTBSTI == "2",
                             "Positive","Negative")
CTdata$CTIndPositive<-as.factor(CTdata$CTIndPositive)
CTdata %>% group_by(OverallPos, CTIndPositive) %>% summarise(n=n())>valuesctind
ctcontingind<-matrix(data = c(178,13,70,41),
                    nrow = 2, ncol = 2)

colnames(ctcontingind)<-c("PCR+ve", "PCR-ve")
rownames(ctcontingind)<-c("CT+ve", "CT-ve")
epi.tests(ctcontingind)->ctindaccuracy

```

## Pooled Regression after Multiple Imputation and Propensity Score Matching

Binomnal Logistic regression with RT-PCR as dependent variable

```

matchedtest %>% with(glm(formula(ff_formula(dependent = "OverallPos",
      explanatory = c("Age",
        "Ethnicity",
        "Sex",
        "RR",
        "GCS",
        "Temperature",
        "HR",
        "SystolicBP",
        "Neutrophils",
        "DDimer",
        "CRP",
        "Troponin",
        "Albumin",
        "CK",
        "Sats",
        "Admitted",
        "AdmittedToITU",
        "ThirtyDayFUTwo",
        "Dyspnoea",
        "Comorbidity",
        "XRChest"))),
      family = "binomial"), all = FALSE)->overallposmatchimp
overallposmatchimp %>% pool()->P
multivarpooleddoverallpos = P %>%
  fit2df(estimate_name = "OR (multiple imputation)", exp = TRUE)

```

'multivarpooleddoverallpos' produces multivariate odds ratios for each explanatory variable, corresponding to Table 4

### Pooled Univariate Odds Ratios for OverallPos as dependent variable

This code is run with each of the explanatory variables in table 4 as arguments to produce their respective odds Ratios in table 4

```

matchedtest %>% with(glm(formula(ff_formula(dependent = "OverallPos",
      explanatory = "XRChest"
    )),
      family = "binomial"))->overallposmatchimpunivar
overallposmatchimpunivar %>% pool()->P
univarpooleddoverallpos = P %>%
  fit2df(estimate_name = "OR (univariate)", exp = TRUE)->univaroverallpos
univaroverallpos

```

### Binomial Logistic Regression with Positive Chest X-ray Report as Dependent Variable

This code follows the format above to produce univariate and multivariate odds ratios for each explanatory variable for having a positive XR report

## Univariate XRPositive as dependent

(different explanatory variables passed into function to produce Odds ratios for each)

```
matchedtest %>% with(glm(formula(ff_formula(dependent = "XRPositive",
                                          explanatory = "Comorbidity"
))),
family = "binomial"))->XRchestmatchimp
XRchestmatchimp %>% pool()->P
multivarpooledXRchest = P %>%
  fit2df(estimate_name = "OR (univariate)", exp = TRUE)->univarXRchest
univarXRchest
```

## Multivariate XRPositive as dependent

```
matchedtest %>% with(glm(formula(ff_formula(dependent = "XRPositive",
                                          explanatory = c("Age",
                                          "OverallPos",
                                          "Ethnicity",
                                          "Sex",
                                          "RR",
                                          "GCS",
                                          "Temperature",
                                          "HR",
                                          "SystolicBP",
                                          "Neutrophils",
                                          "DDimer",
                                          "CRP",
                                          "Troponin",
                                          "Albumin",
                                          "CK",
                                          "Sats",
                                          "Admitted",
                                          "AdmittedToITU",
                                          "ThirtyDayFUTwo",
                                          "Dyspnoea",
                                          "Comorbidity"
))),
family = "binomial"))->XRchestmatchimp
XRchestmatchimp %>% pool()->P
multivarpooledXRchest = P %>%
  fit2df(estimate_name = "OR (multivariate)", exp = TRUE)->multivarXRchest
multivarXRchest
```

## Pooled Ordinal Logistic Regression with XRPositive as dependent

This code also produces multivariate odds ratios for table 5, however, uses ordinal linear regression after the CXR report variable is converted to an ordered categorical variable, with alternative pathology as the lowest and classic covid as the highest value (see table 3)



```

matchedtest %>% with(clm(formula = XRChest ~ Age +
                        OverallPos+
                        Ethnicity+
                        Sex+
                        RR+
                        GCS+
                        Temperature+
                        HR+
                        SystolicBP+
                        Neutrophils+
                        DDimer+
                        CRP+
                        Troponin+
                        Sats+
                        Admitted+
                        AdmittedToITU+
                        ThirtyDayFUTwo+
                        Dyspnoea+
                        Comorbidity))->XRChestmatchimpord

pool(object = XRChestmatchimpord[["analyses"]])->P
multivarpooledXRChestord = P %>%
  fit2df(estimate_name = "OR (multivariate)", exp = TRUE)->multivarXRChestord
multivarXRChestord

```

## Forest Plots

Creates forest plots for post matched regression tables above:

```

Figure1Forest <- read_excel("Figure1Forest.xlsx",
                           col_types = c("text", "numeric", "numeric",
                                           "numeric", "text", "text"))

tabletext1<-cbind(Figure1Forest$explanatory, Figure1Forest$summary)
forestplot (tabletext1, Figure1Forest$Mean,
            Figure1Forest$Lower, Figure1Forest$Upper, is.summary = FALSE,
            clip = c(0, 2),
            xlab="\u2190 Decreased Odds SARS-CoV 2          Increased Odds SARS-CoV 2 \u2192",
            zero=1, cex=0.9, lineheight = unit(6,"mm"), boxsize=0.4, colgap=unit(6,"mm"),
            lwd.ci=2, ci.vertices=TRUE, ci.vertices.height = 0.4,
            title="Odds Ratio of Positivity for SARS-CoV 2 by RT-PCR",
            txt_gp=fpTxtGp(label=gpar(cex=1.25),
                            ticks=gpar(cex=1.1),
                            xlab=gpar(cex = 1.2),
                            title=gpar(cex = 1.2)),
            graphwidth = unit(200,"mm")
            )

```

Figure 1:

Odds Ratio of Positivity for SARS-CoV 2 by RT-PCR

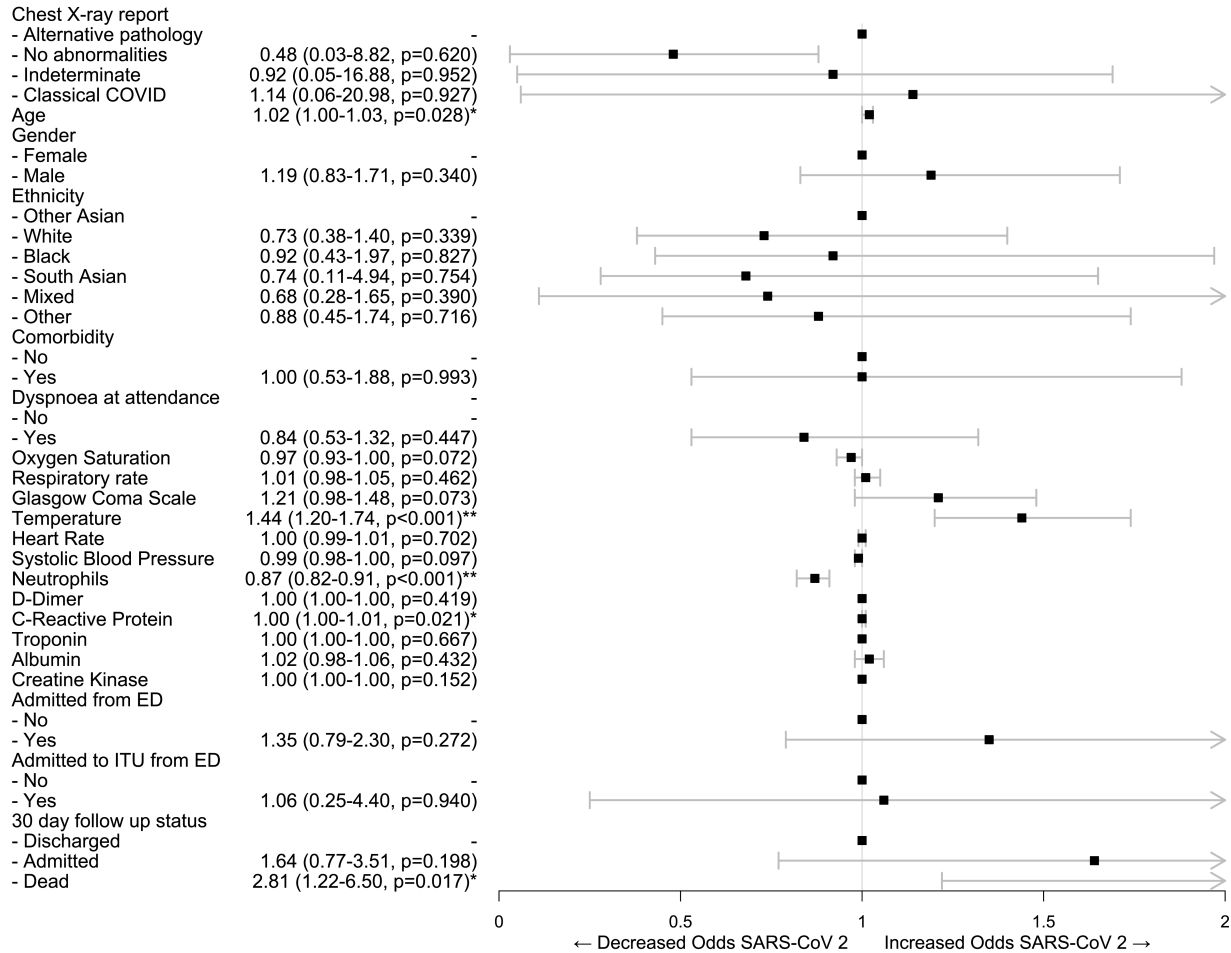

Figure 2 (XR dependent):

```
Figure2Forest <- read_excel("Figure2Forest.xlsx",
                           col_types = c("text", "numeric", "numeric",
                                         "numeric", "text", "text"))

tabletext2<-cbind(Figure2Forest$explanatory,Figure2Forest$summary)
forestplot (tabletext2, Figure2Forest$Mean,
           Figure2Forest$Lower, Figure2Forest$Upper, is.summary = FALSE,
           clip = c(0, 2),
           xlab="\u2190 Decreased Odds of Classical X-Ray           Increased Odds of Classical X-Ray \u2192",
           zero=1, cex=0.9, lineheight = unit(6,"mm"), boxsize=0.5, colgap=unit(6,"mm"),
           lwd.ci=2, ci.vertices=TRUE, ci.vertices.height = 0.4,
```

```

title="Odds Ratio of Classical COVID-19 Findings on Chest X-Ray",
txt_gp=fpTxtGp(label=gpar(cex=1.25),
               ticks=gpar(cex=1.1),
               xlab=gpar(cex = 1.2),
               title=gpar(cex = 1.2)),
graphwidth = unit(200,"mm")
)

```

**Odds Ratio of Classical COVID-19 Findings on Chest X-Ray**

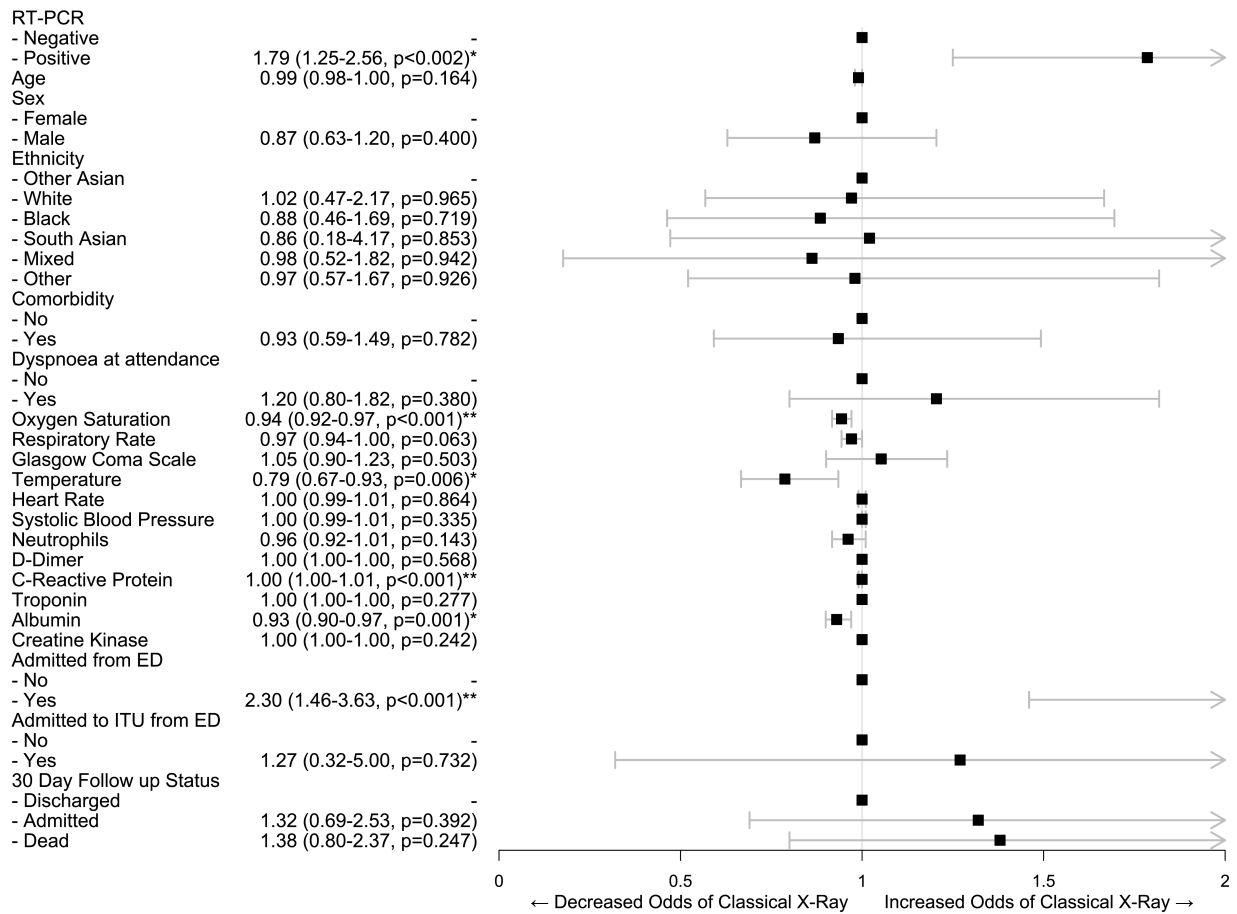

## Correlation Matrix

This section creates a plot of correlation between all the variables in the raw data

```
library(corrplot);library(Hmisc)
```

Relevel factors so relevant value is first

```
relevel(data$XRPositive, "Negative")->data$XRPositive  
relevel(data$Admitted, "Discharged")->data$Admitted  
relevel(data$AdmittedToITU, "No")->data$AdmittedToITU
```

New variable for correlation matrix

```
cor<-data
```

Remove variables with high missings/ data which won't work e.g. date, RT-PCR removed as it only represents initial ED swab, OverallPos used instead as this includes subsequent swabs in 30 days

```
cor<-subset(data, select = -c(CT,DateOfDeath,DateOfDischarge,RTPCR,  
DateOfVisit,DateOfSymptomOnset,FollowUpPos,TimeToDeath,NEWS))
```

Format and re-name values

```
cor$CTPositive <-  
  ifelse(cor$CTBSTI == "1", "Positive", "Negative")  
cor$CTPositive<-as.factor(cor$CTPositive)  
cor$CTPositive<-relevel(cor$CTPositive,"Negative")  
cor$Death<-as.factor(ifelse(cor$ThirtyDayFU == "4", "Dead", "Alive"))  
relevel(cor$Death, "Alive")->cor$Death  
cor$OverallPos<-as.factor(cor$OverallPos)  
cor<-sapply(cor, as.numeric)
```

Create new numerical correlation matrix

```
cor(cor, method = "spearman", use = "pairwise.complete.obs")->cormatrixall
```

This variable also contains p-values so identification of only significant correlations is possible:

```
cormatrixall2 <- rcorr(as.matrix(cor), type ="spearman")
```

Function to create and format correlation matrix plot

```
corrplot(cormatrixall2$r, method = "color", type = "full", order = "hclust",  
p.mat = cormatrixall2$p, sig.level = 0.05, insig = "blank",  
tl.col = "black", outline = "white",  
title = "Correlation Matrix of Explanatory and Outcome Variables",  
line = -1, cex.main = 2, adj.main = 0.5)
```

# Correlation Matrix of Explanatory and Outcome Variables

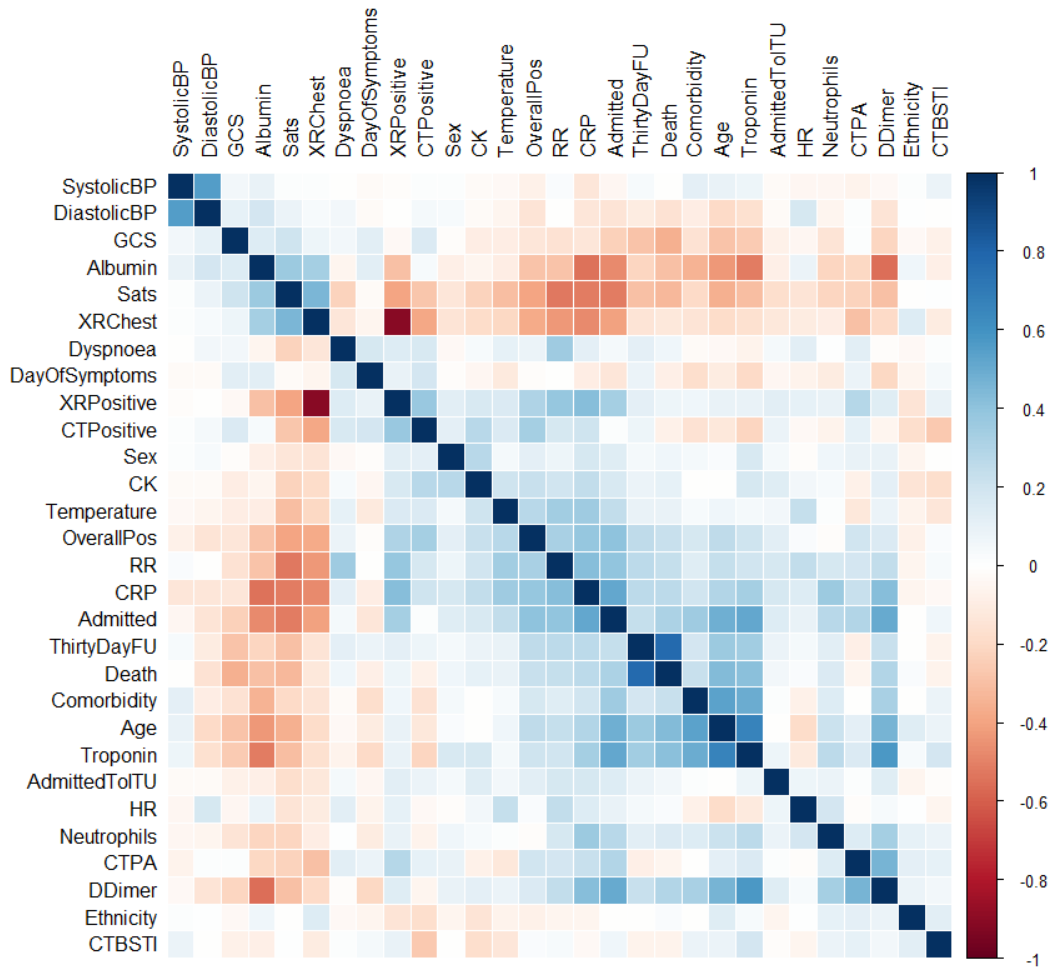

Supplement: Supplementary file [file 2020.07.07.20147934-1.pdf]
